# Supplementary material for: miR-328-3p targets TLR2 to ameliorate oxygen-glucose deprivation injury and neutrophil extracellular trap formation in HUVECs via inhibition of the NF-κB signaling pathway
Source: PubMed Central journal article supplement (PMC10889604; doi:10.1371/journal.pone.0299382), 2024-02-23

Below are the original western blot images for TLR2, P65 NF- $\kappa$ B, p-P65 NF- $\kappa$ B, NLRP3, IL-1 $\beta$ , IL-18 and  $\beta$ -actin. The sample size is 4, and the sample order of the bands are all Normal, OGD-Normal, OGD-NC mimic, OGD-mimic, OGD-NC inhibitor, and OGD-inhibitor.

### TLR2

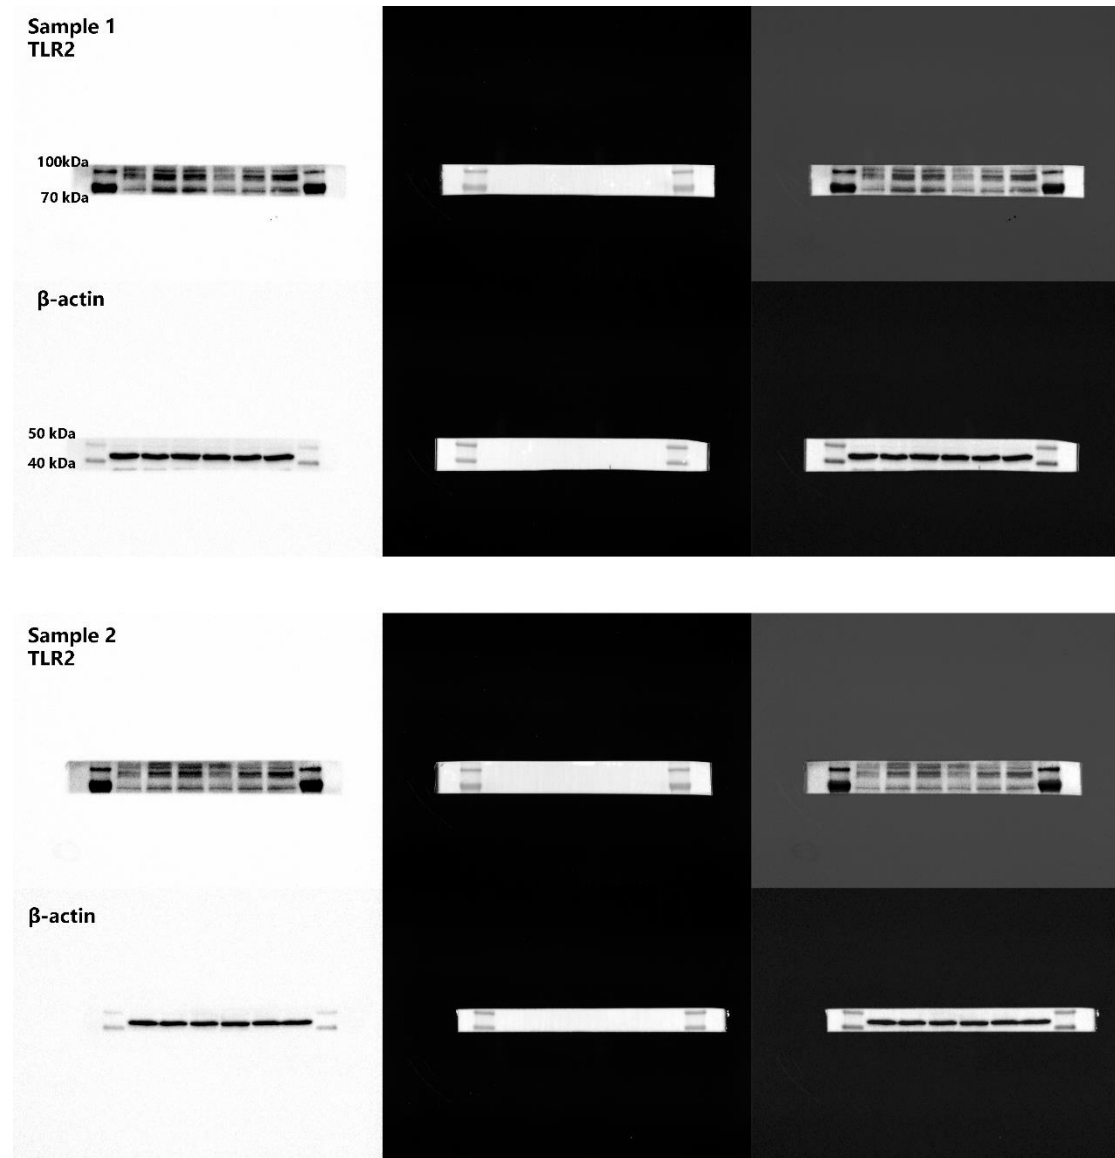

Sample 3  
TLR2

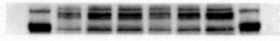

$\beta$ -actin

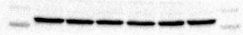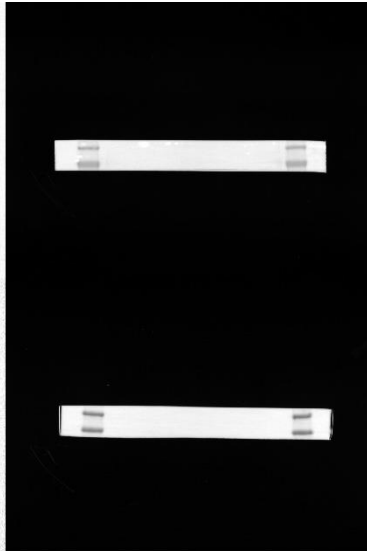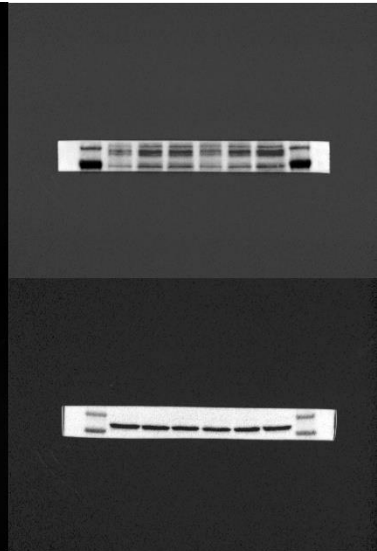

Sample 4  
TLR2

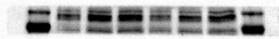

$\beta$ -actin

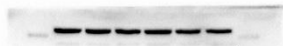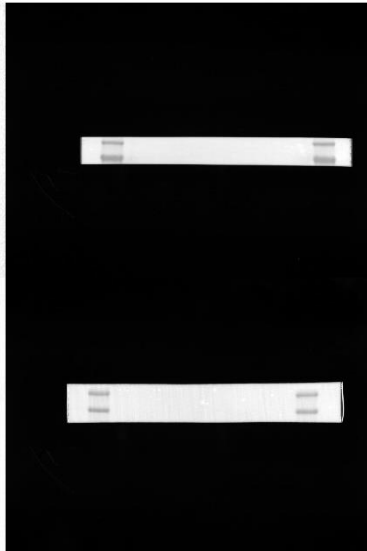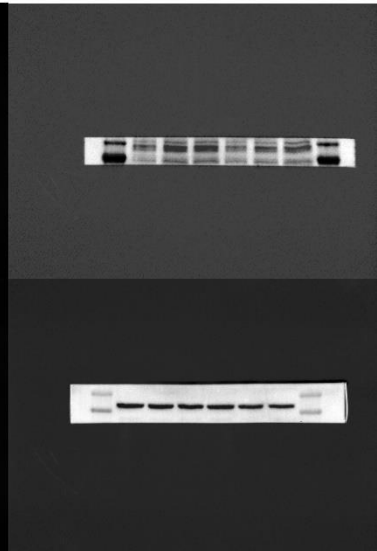

p-P65 NF- $\kappa$ B and P65 NF- $\kappa$ B

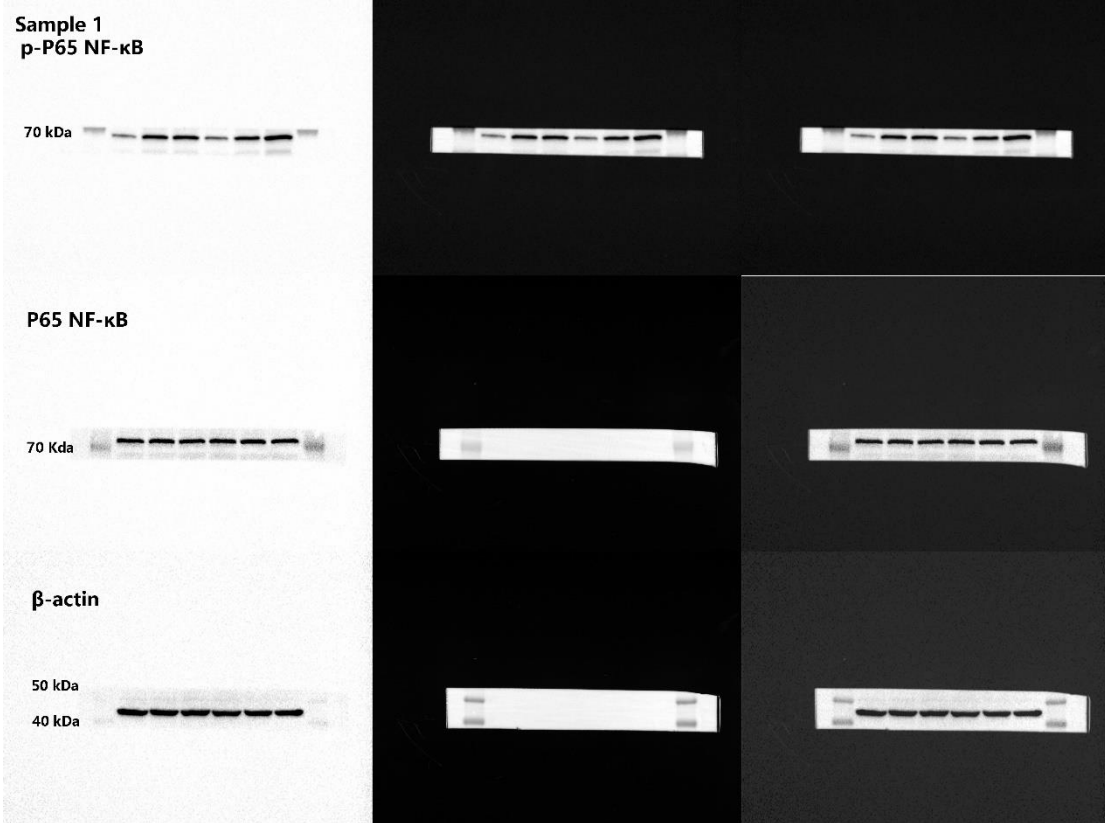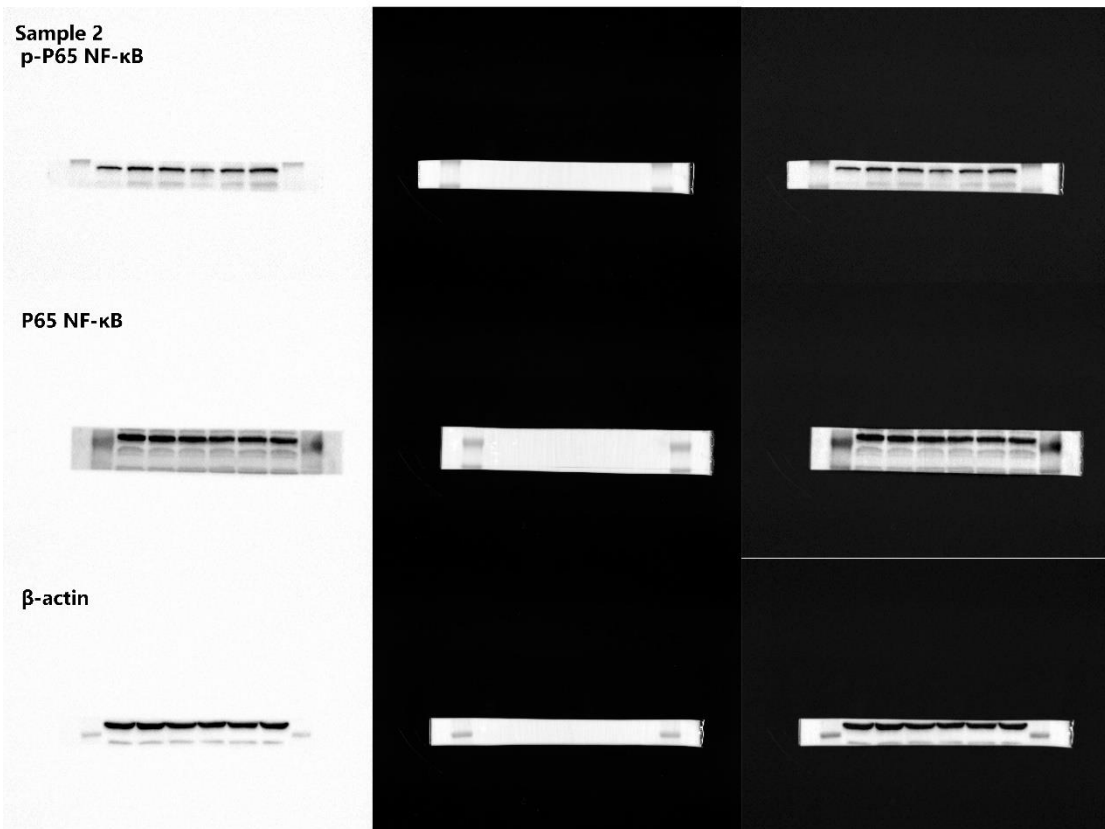

Sample 3  
p-P65 NF-κB

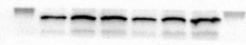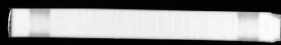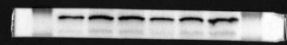

P65 NF-κB

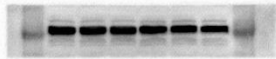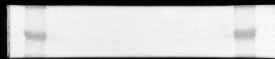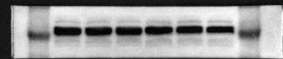

β-actin

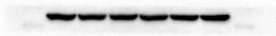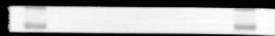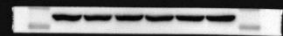

Sample 4  
p-P65 NF-κB

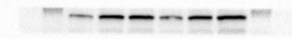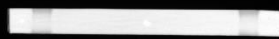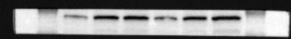

P65 NF-κB

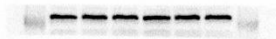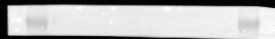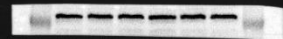

β-actin

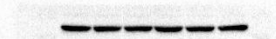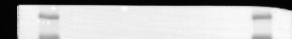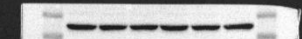

# NLRP3

Sample 1  
NLRP3

150 kDa  
100 kDa

$\beta$ -actin

50 kDa  
40 kDa

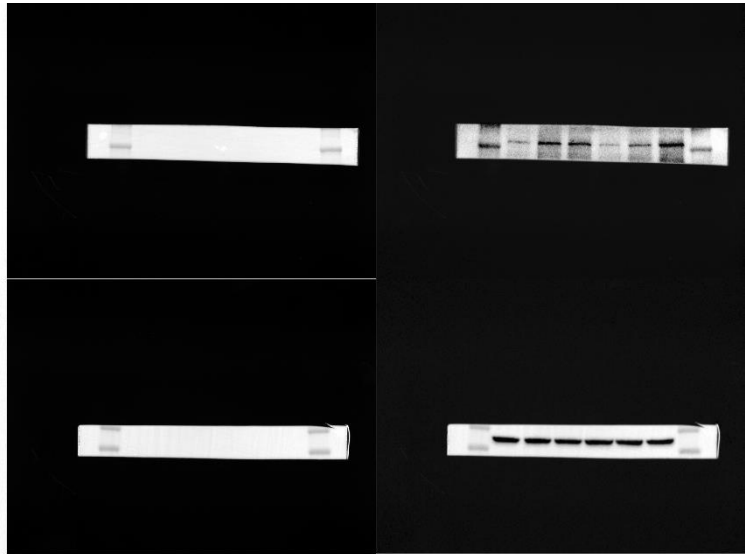

Sample 2  
NLRP3

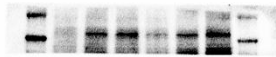

$\beta$ -actin

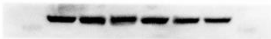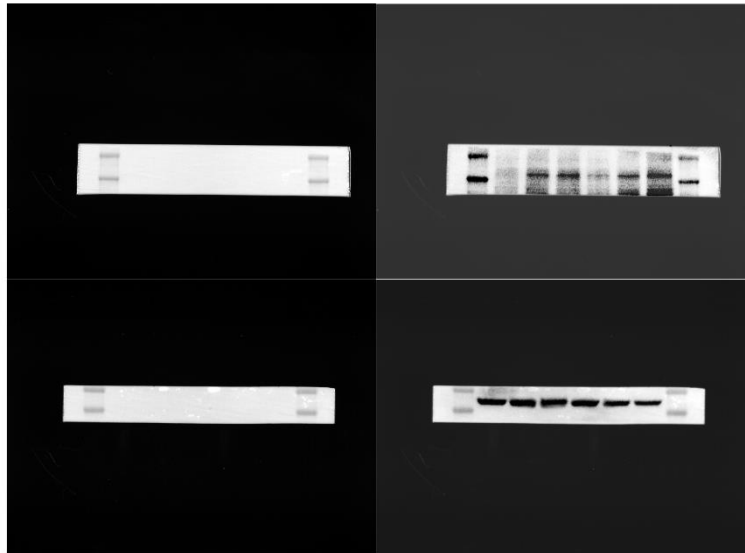

Sample 3  
NLRP3

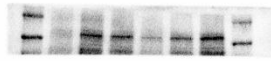

$\beta$ -actin

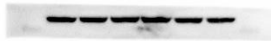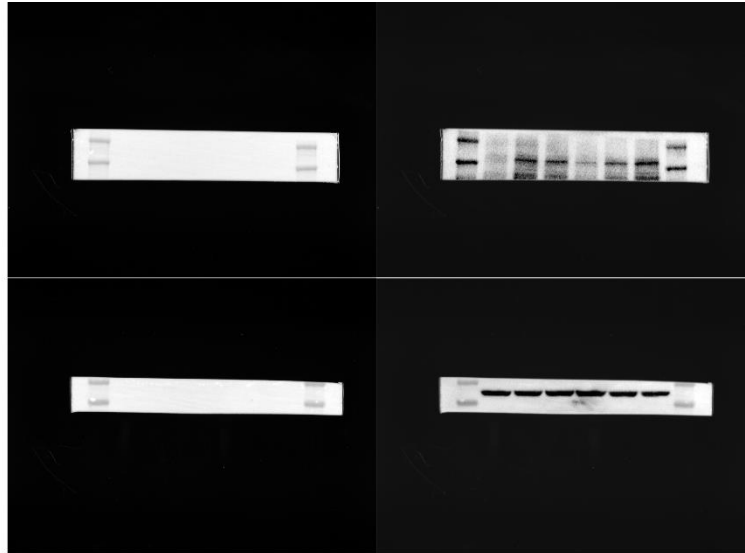

Sample 4  
NLRP3

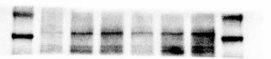

$\beta$ -actin

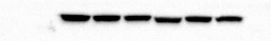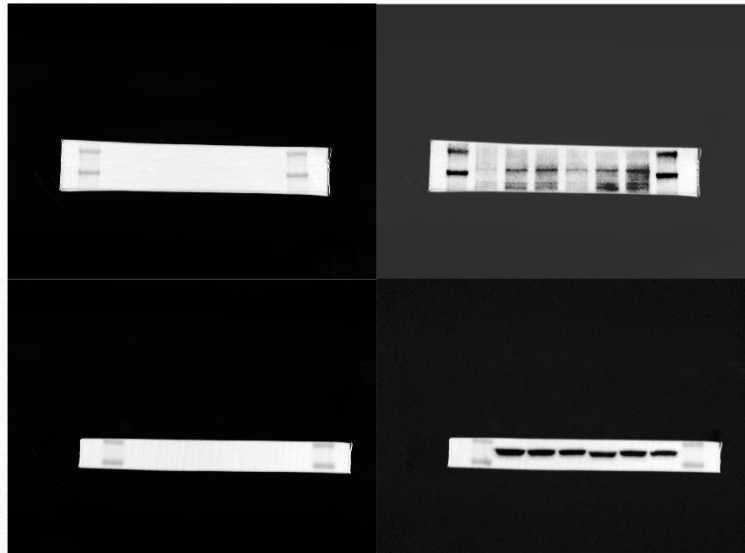

# IL-1 $\beta$

Sample 1  
IL-1 $\beta$

25 kDa  
20 kDa

$\beta$ -actin

40 kDa

Sample 2  
IL-1 $\beta$

$\beta$ -actin

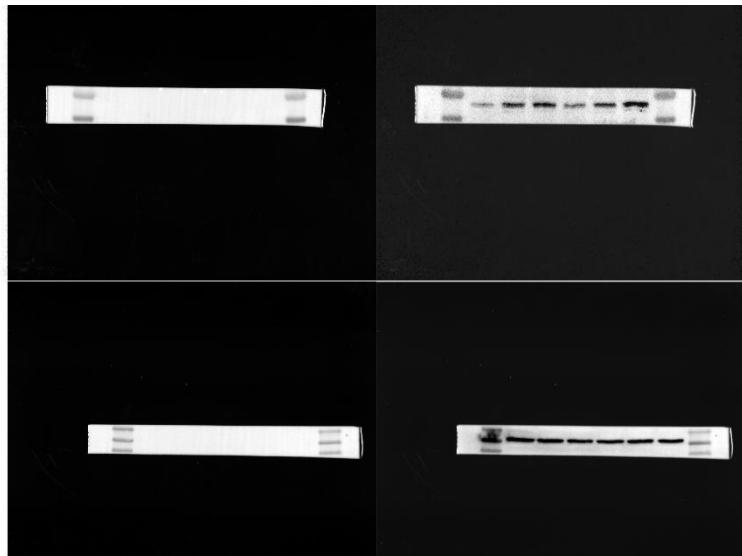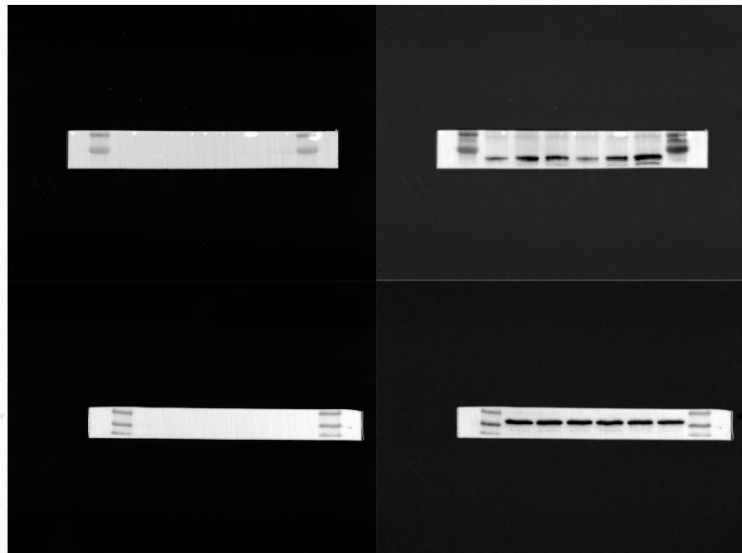

Sample 3  
IL-1 $\beta$

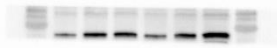

$\beta$ -actin

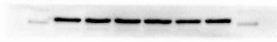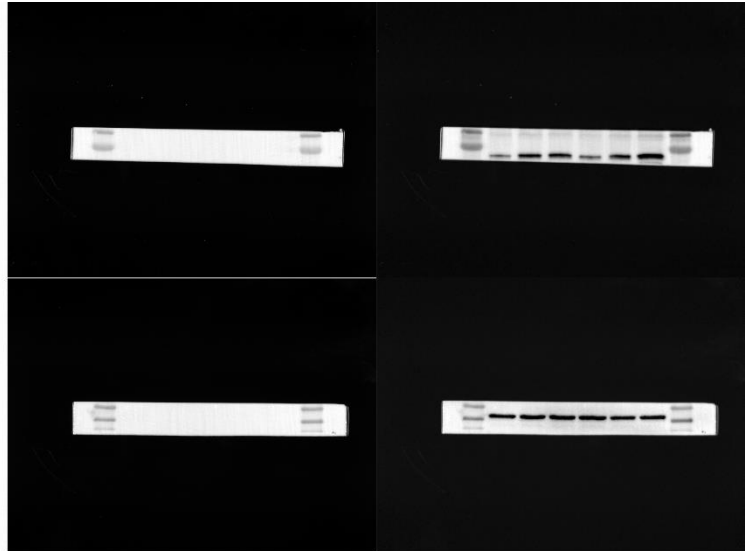

Sample 4  
IL-1 $\beta$

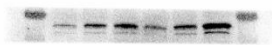

$\beta$ -actin

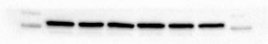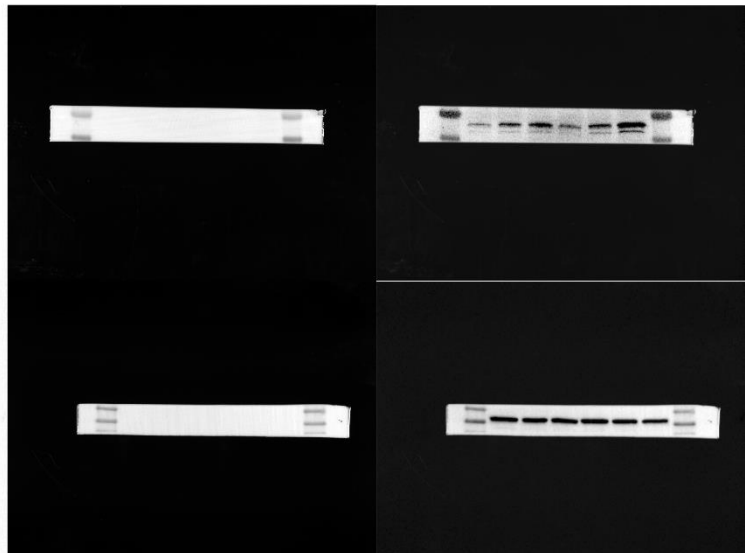



# IL-18

## Sample 1 IL-18

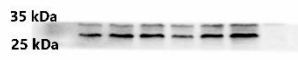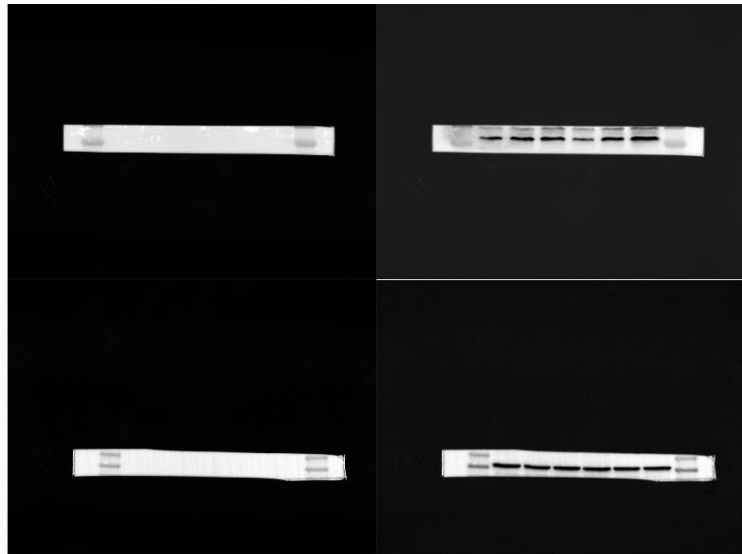

## $\beta$ -actin

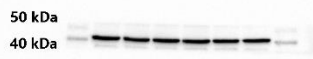

## Sample 2 IL-18

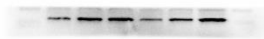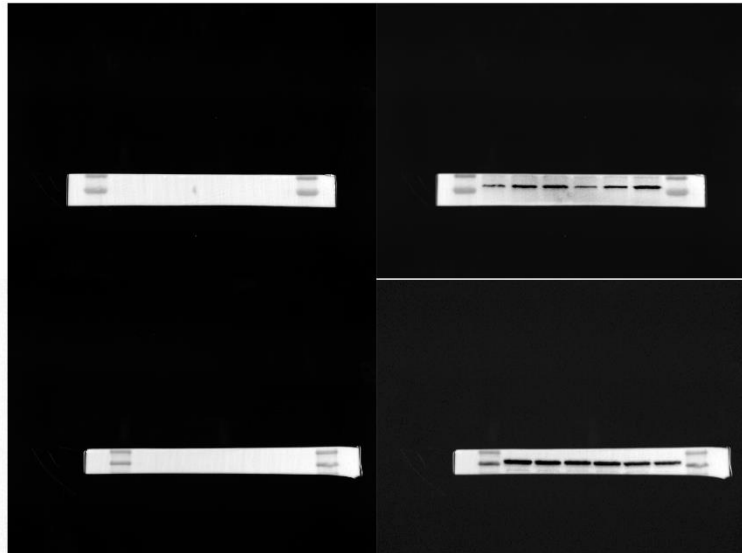

## $\beta$ -actin

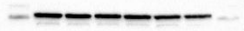

Sample 3  
IL-18

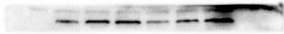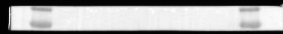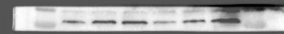

$\beta$ -actin

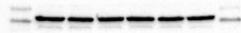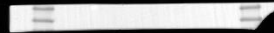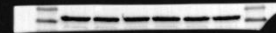

Sample 4  
IL-18

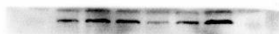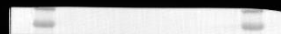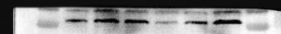

$\beta$ -actin

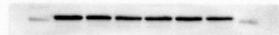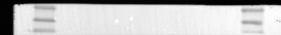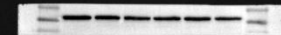

Supplement: pone.0299382.s001.pdf [file pone.0299382.s001.pdf]
